# Supplementary material for: Phenotypic and Transcriptomic Analyses of Autotetraploid and Diploid Mulberry (Morus alba L.)
Source: MDPI journal article supplement (doi:10.3390/ijms160922938), 2015-09-22
Supplement: s1 [file s1]

# Supplementary Information

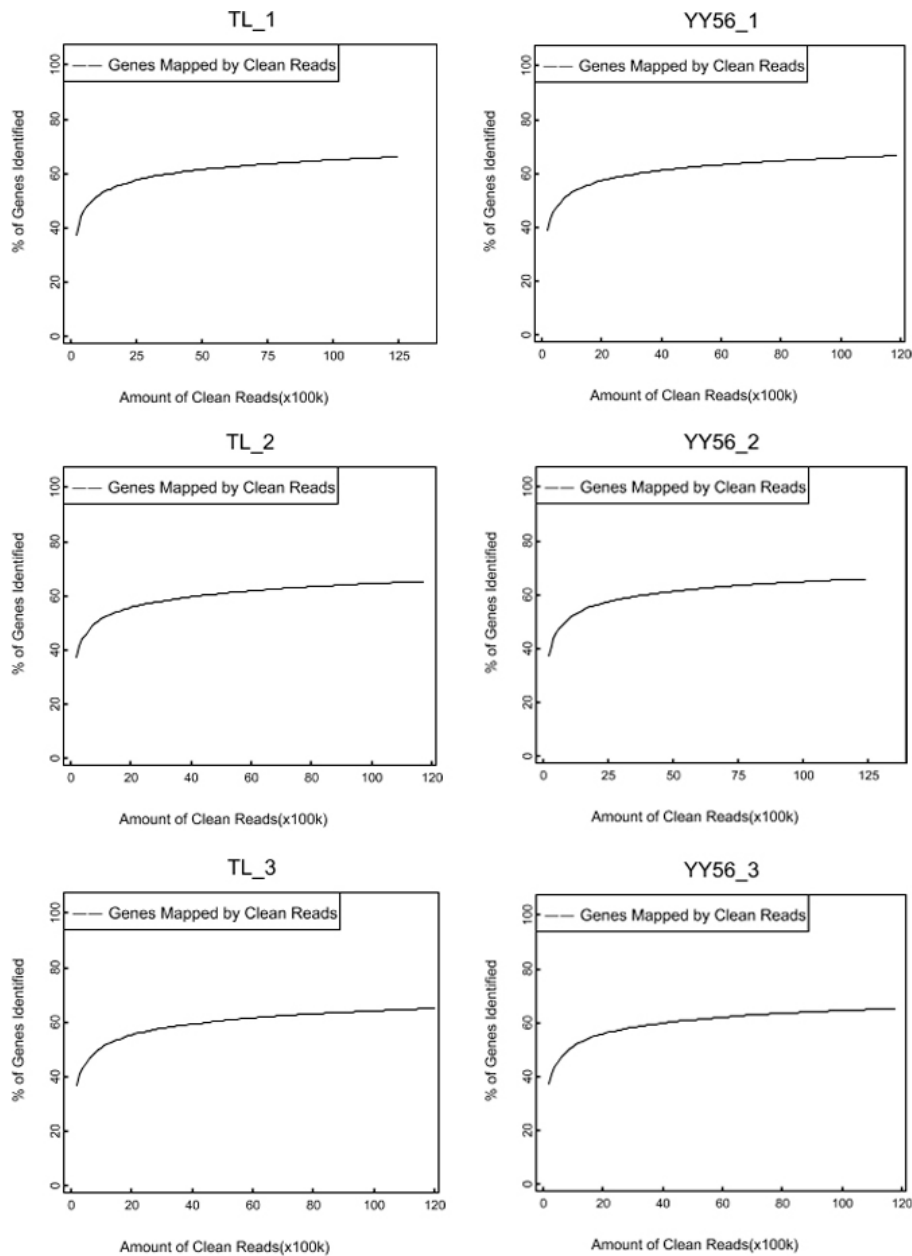

**Figure S1.** Sequencing saturation for all of the diploid (TL-1, -2, and -3) and autotetraploid (YY56-1, -2, and -3) samples. Each graph shows the genes mapped by clean reads.

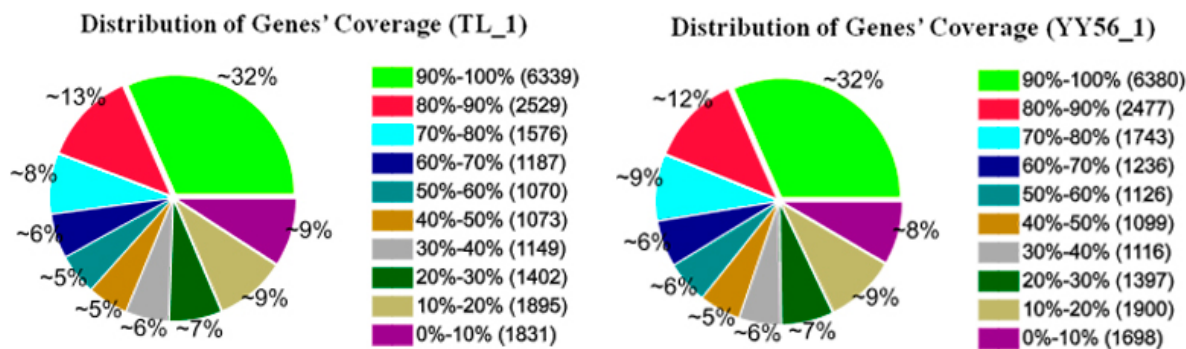

**Figure S2.** *Cont.*

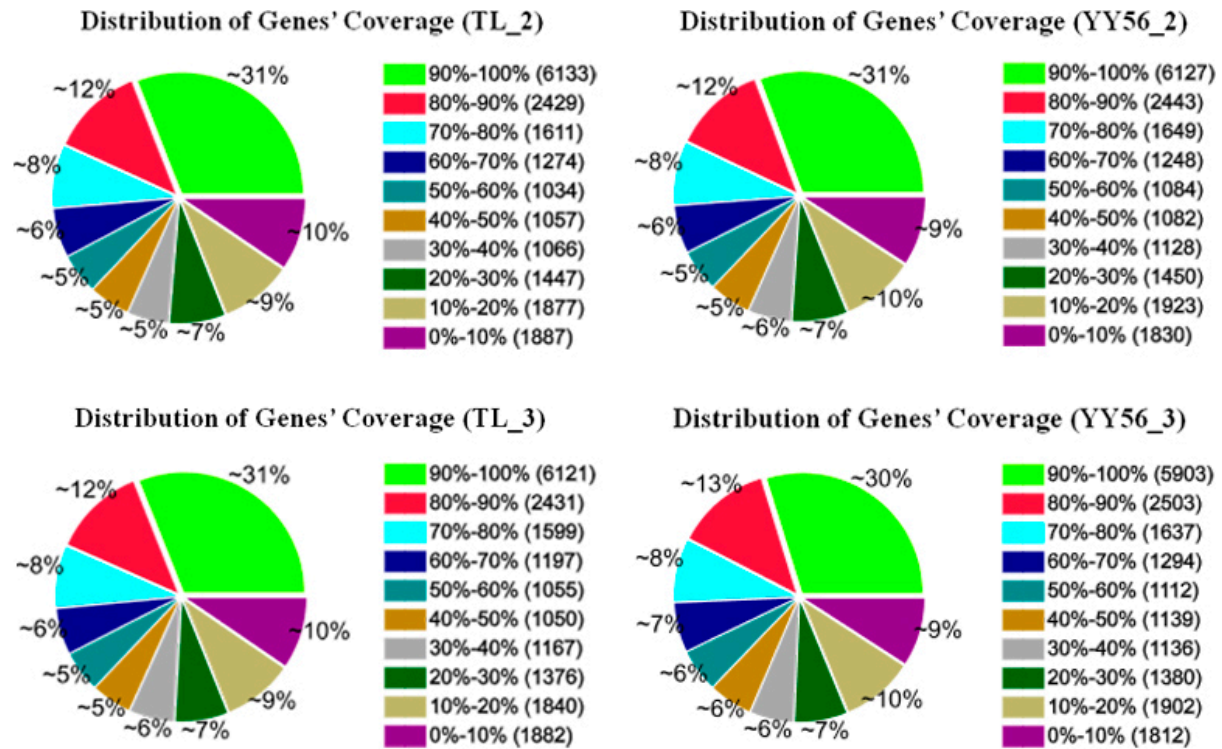

**Figure S2.** Distribution of gene coverage for the clean reads from all of the diploid (TL-1, -2, and -3) and autotetraploid (YY56-1, -2, and -3) samples.

**Table S3.** Primers used for qPCR.

| Gene ID     | Gene Annotation                               | Primer Sequence (5'–3')                                       |
|-------------|-----------------------------------------------|---------------------------------------------------------------|
| Morus007429 | Photosystem I reaction center subunit XI      | F: CAATCAACGGCGATCCCTTC<br>R: CCTGAGGAGTGGGCTGACTGC           |
| Morus023580 | Monothiol glutaredoxin                        | F: GGCGGTGTTTATAGGCGGCGA<br>R: TCAAACCCATAAAGCTCCAGCG         |
| Morus013990 | DELLA protein GAI                             | F: TTCCATACGGAAAGTTTGCTCACT<br>R: CAGTAGCCTCGATCATCTGAGACC    |
| Morus010360 | Phospholipase A1                              | F: AATGAGGCGTTTAGGAAGAGGGTA<br>R: GTAACGAACTTATGAGGGGCAAGCA   |
| Morus017265 | Chalcone isomerase                            | F: TTAGAGGTGGAGACACAGTGGTTTC<br>R: GACACGGCTTCATCCTTCAAGTACA  |
| Morus010031 | Cytokinin biosynthetic isopentenyltransferase | F: GGAAAGACAAGGTGGTTTTTCGTGAT<br>R: ATTTTGTCTGGAATTGATGATCTCG |
| Morus005139 | Cytochrome C1                                 | F: ATTCGTAGAGGTCACCAGGTCTACC<br>R: CTTTGTCTCTTCTTCAGCGTAAGCA  |
| Morus012127 | Polyphenol oxidase                            | F: CCTACCAACTGTTGCCCACTAATA<br>R: CAATGTACGCCTCGTCAACTGTATG   |
| Morus013583 | Calcium-binding protein                       | F: TGAAGATGGGAGGATGAGAAGAGAA<br>R: TCTCGTCAAACAGCGATGAAAGC    |
| Morus011259 | WRKY transcription factor                     | F: GTTCCCAATCATGGACTAAAATCAC<br>R: TGCGGGTGCATCTAAAGTAAGCC    |
